# Supplementary material for: Rapid Global Expansion of Invertebrate Fisheries: Trends, Drivers, and Ecosystem Effects
Source: PLOS journal article supplement (doi:10.1371/journal.pone.0014735), 2011-03-08
Supplement: S14 (10.1371/journal.pone.0014735.s014) [file journal.pone.0014735.s014]

**Table S3.** Major gear groupings of gear categories from the Sea Around Us Project catch database.

| Major gear grouping           | Minor gear categories                                                             |
|-------------------------------|-----------------------------------------------------------------------------------|
| Hand dredges and rakes        | Hand dredges<br>Raking devices                                                    |
| Lines and hooks               | Lines<br>Squid hooks                                                              |
| Diving and grasping           | By diving<br>Grasping with hand<br>Tongs                                          |
| Traps and pots                | Without gear<br>Box-like traps<br>Traps<br>Pots                                   |
| Nets and midwater trawls      | Driftnets<br>Gillnets<br>Ring nets<br>Bagnets<br>Purse seines<br>Mid-water trawls |
| Benthic trawling and dredging | Bottom trawls<br>Dredges                                                          |
