# Supplementary material for: Rapid Global Expansion of Invertebrate Fisheries: Trends, Drivers, and Ecosystem Effects
Source: PLoS One. 2011 Mar 8;6(3):e14735. doi: 10.1371/journal.pone.0014735 (PMC3050978; doi:10.1371/journal.pone.0014735)
Supplement: Table S1 — Invertebrate catch for the 6 LMEs with the greatest total catch from 2000–2004. Also shown are the 3 taxonomic groups within each LME with the greatest catch. Catch values shown are annual averages over the 5-year span. LMEs are ordered by decreasing catch and within the LMEs the taxonomic groups are ordered by decreasing catch of that taxon. (0.03 MB PDF) [file pone.0014735.s012.pdf]

**Table S1.** Invertebrate catch for the 6 LMEs with the greatest total catch from 2000–2004. Also shown are the 3 taxonomic groups within each LME with the greatest catch. Catch values shown are annual averages over the 5-year span. LMEs are ordered by decreasing catch and within the LMEs the taxonomic groups are ordered by decreasing catch of that taxon.

| LME name                    | Catch (t/sq. km) | Taxonomic group    | Taxon catch (t/sq. km) |
|-----------------------------|------------------|--------------------|------------------------|
| Yellow Sea                  | 2.11             | Shrimps and prawns | 0.60                   |
|                             |                  | Bivalves           | 0.53                   |
|                             |                  | Crabs              | 0.34                   |
| East China Sea              | 1.67             | Bivalves           | 0.50                   |
|                             |                  | Shrimps and prawns | 0.44                   |
|                             |                  | Squids             | 0.24                   |
| N.E. U.S. Continental Shelf | 1.9              | Bivalves           | 1.55                   |
|                             |                  | Crabs              | 0.13                   |
|                             |                  | Lobsters           | 0.13                   |
| Newfoundland-Labrador Shelf | 0.57             | Shrimps and prawns | 0.21                   |
|                             |                  | Bivalves           | 0.20                   |
|                             |                  | Crabs              | 0.12                   |
| South China Sea             | 0.52             | Shrimps and prawns | 0.17                   |
|                             |                  | Bivalves           | 0.11                   |
|                             |                  | Squids             | 0.07                   |
| Patagonian Shelf            | 0.47             | Squids             | 0.39                   |
|                             |                  | Bivalves           | 0.04                   |
|                             |                  | Shrimps and prawns | 0.04                   |
