# Supplementary material for: Rapid Global Expansion of Invertebrate Fisheries: Trends, Drivers, and Ecosystem Effects
Source: PLoS One. 2011 Mar 8;6(3):e14735. doi: 10.1371/journal.pone.0014735 (PMC3050978; doi:10.1371/journal.pone.0014735)
Supplement: Table S4 — Classification of invertebrate taxonomic groups into primary and secondary functional groups. Taxa are ordered approximately by decreasing trophic level. (0.05 MB PDF) [file pone.0014735.s015.pdf]

**Table S4.** Classification of invertebrate taxonomic groups into primary and secondary functional groups. Taxa are ordered approximately by decreasing trophic level.

| Taxa              | Primary                                    | Secondary                                              | Reference |
|-------------------|--------------------------------------------|--------------------------------------------------------|-----------|
| Octopus           | Prey, Predators                            |                                                        | [1, 2]    |
| Cuttlefishes      | Prey, Predators                            |                                                        | [1, 2]    |
| Squids            | Prey, Predators                            |                                                        | [1, 2]    |
| Sea stars         | Prey, Predators                            | Scavengers                                             | [2]       |
| Shrimps and prawn | Prey, Predators                            | Herbivores, Filter feeders,<br>Scavengers/Detritivores | [2, 3]    |
| Crabs             | Prey, Scavengers,<br>Herbivores, Predators |                                                        | [4]       |
| Lobsters          | Prey, Predators, Scavengers                |                                                        | [4]       |
| Krill             | Prey, Filter feeders                       |                                                        | [3]       |
| Urchins           | Prey, Herbivores                           | Predators                                              | [3]       |
| Gastropods        | Prey, Herbivores                           | Scavengers, Predators                                  | [2]       |
| Sea cucumbers     | Prey, Detritivores, Filter feeders         |                                                        | [2, 3]    |
| Bivalves          | Prey, Filter feeders, Habitat              | Detritivores                                           | [2]       |

## References

1. Boyle PR, Rodhouse P (2005) Cephalopods: Ecology and Fisheries. Wiley-Blackwell.
2. Hickman CP, Roberts LS, Larson A, l'Anson H, Eisenhour DJ (2006) Integrated Principles of Zoology. New York, NY, USA: McGraw-Hill, 13<sup>th</sup> edition.
3. Ruppert EE, Fox RS, Barnes RD (2004) Invertebrate zoology: a functional evolutionary approach. Belmont, CA, USA: Thomson-Brooks/Cole, 7<sup>th</sup> edition.
4. Pearse V, Pearse J, Buchsbaum M, Buchsbaum R (1987) Living invertebrates. Palo Alto, CA, USA: Blackwell Scientific Publications.
